# Supplementary material
Source: PubMed Central journal article supplement (PMC7384378)
Supplement: NIHMS1605196-supplement-supplementary_material.pdf [file NIHMS1605196-supplement-supplementary_material.pdf]

## **Online Data Supplement**

### **Thrombin receptor PAR4 drives canonical NLRP3 inflammsome signaling in the heart**

Anke C. Fender<sup>1</sup>, Sonja Kleeschulte<sup>2</sup>, Svenja Stolte<sup>1</sup>, Katja Leineweber<sup>1</sup>, Markus Kamler<sup>3</sup>, Johannes Bode<sup>2</sup>, Na Li<sup>4</sup>, Dobromir Dobrev<sup>1</sup>

<sup>1</sup> Institute of Pharmacology, West German Heart and Vascular Center, Medical Faculty, University Duisburg-Essen, Germany

<sup>2</sup> Clinic for Gastroenterology, Hepatology and Infectious Diseases, University Hospital, Düsseldorf, Germany

<sup>3</sup> Department of Thoracic and Cardiovascular Surgery, West German Heart and Vascular Center, Medical Faculty, University Duisburg-Essen, Germany

<sup>4</sup> Department of Medicine (Section of Cardiovascular Research), Baylor College of Medicine, Houston, TX, USA

#### **Corresponding author**

Anke C. Fender

Institute of Pharmacology, West German Heart and Vascular Center  
University Duisburg-Essen, Hufelandstr. 55, 45122 Essen, Germany

anke.fender@uk-essen.de

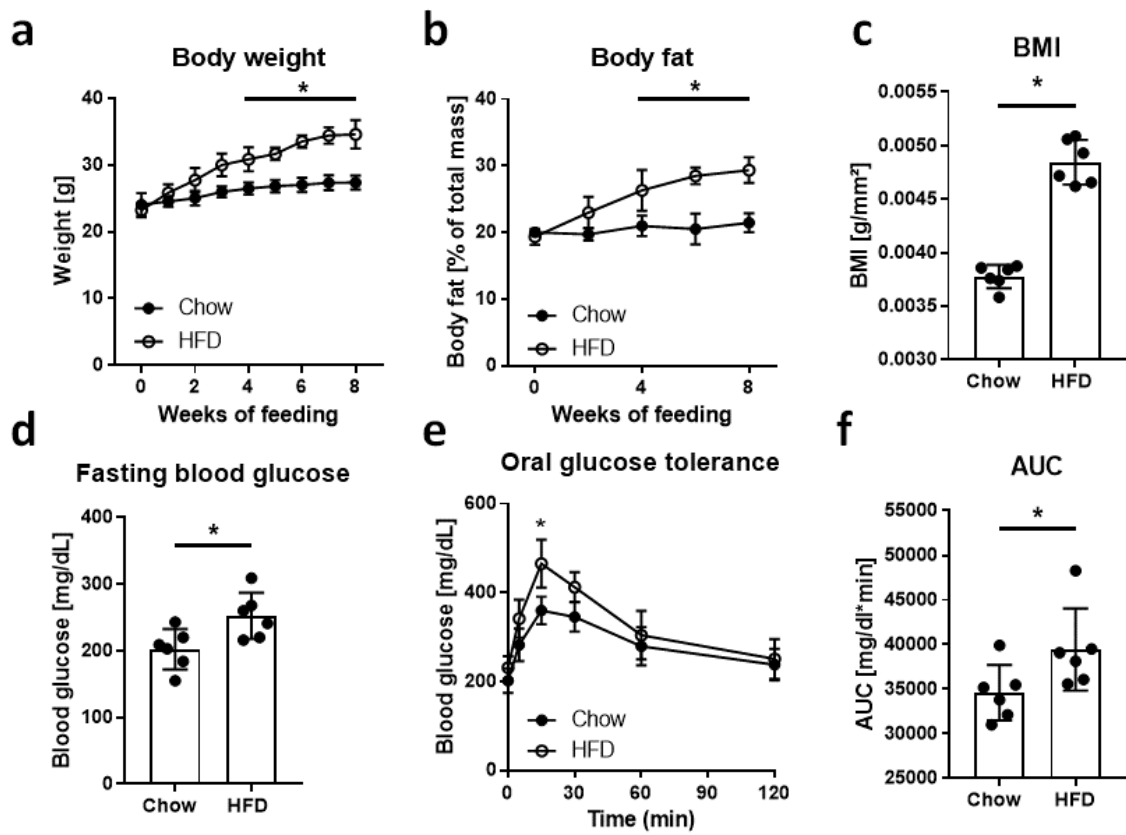

### Supplementary Fig. S1

Mouse model of high fat diet (HFD)-induced metabolic disease. **a** Body weight, **b** body fat accumulation as % of total body mass and **c** BMI in mice fed HFD or standard chow for 8 weeks (n=6 each). **d** Fasting blood glucose, **e** oral glucose tolerance test (oGTT) and **f** area under the curves (AUC) of oGTT after 6 weeks of HFD or chow. Data show mean  $\pm$  SD. \*P<0.05 vs. chow

**a**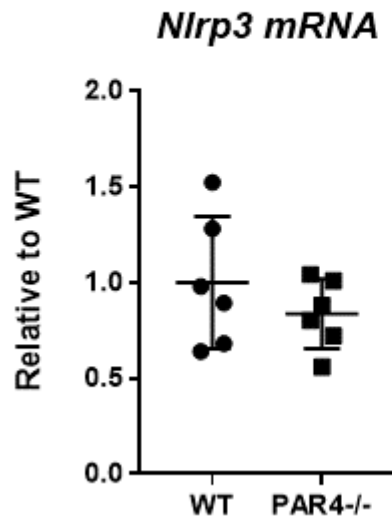**b**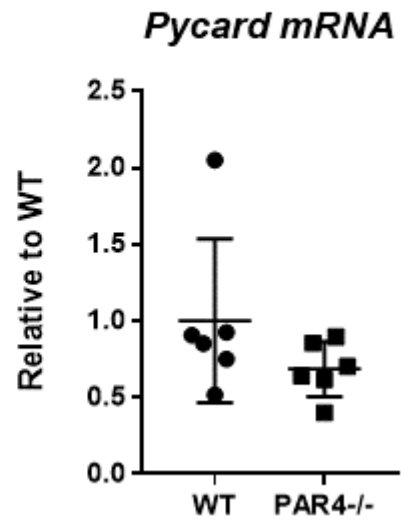**Supplementary Fig. S2**

PAR4 deletion does not affect NLRP3 or ASC gene expression in HFD-fed mice. **a** *Nlrp3* and **b** *Pycard* (ASC) mRNA expression, normalized to GATA4, in LV lysates of wildtype (WT) and PAR4<sup>-/-</sup> mice fed a HFD for 8 weeks (n=6 each). Data show mean ± SD, relative to WT.

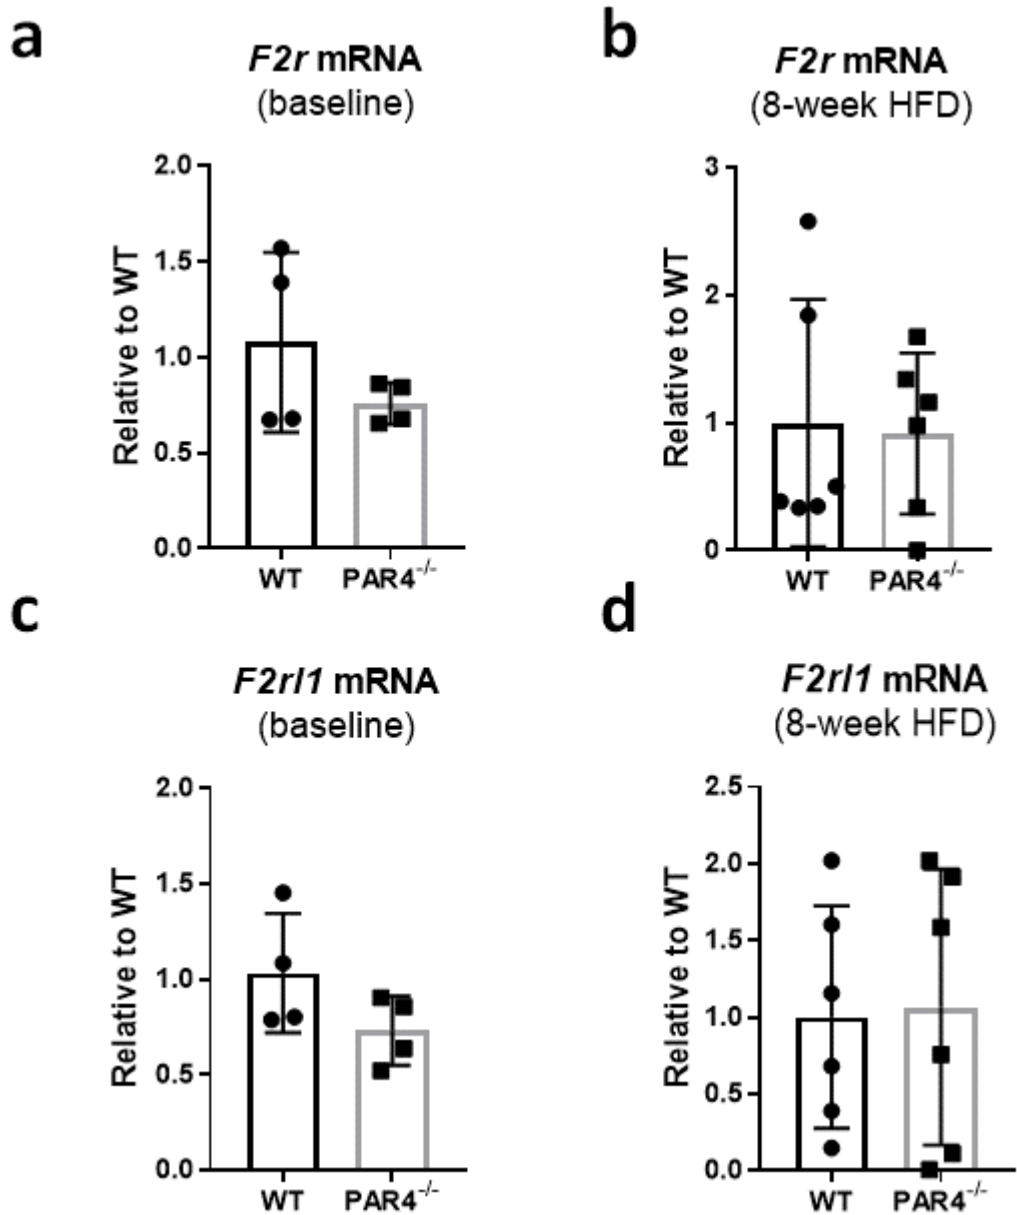

**Supplementary Fig. S3**

PAR4 deletion does not significantly regulate other PAR subtypes. **a** *F2r* (PAR1) mRNA expression, normalized to ribosomal 18S, in LV lysates of wildtype (WT) and PAR4<sup>-/-</sup> mice, determined prior to (n=4) or **b** after 8 weeks of HFD (n=6). **c** *F2rl1* (PAR2) mRNA prior to (n=4) or **d** after 8 weeks of HFD (n=6). Data show mean ± SD, relative to WT.

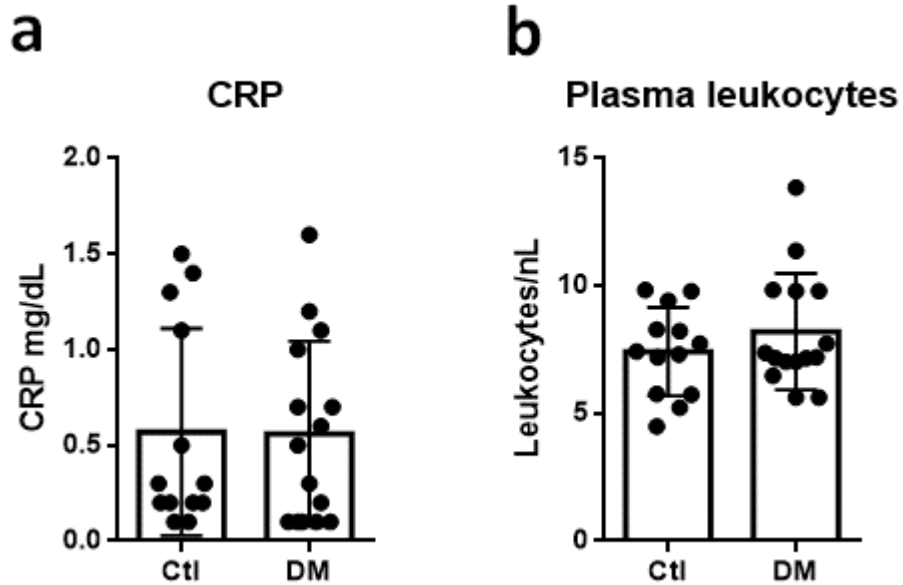

**Supplementary Fig. S4**

Inflammatory plasma markers. **a** Plasma levels of C-reactive protein (CRP) and **b** leukocyte counts determined in patients with type 2 diabetes mellitus (DM, n=15) or non-diabetic control patients (Ctl, n=13) prior to cardiac surgery and tissue sampling. Data show mean  $\pm$  SD, relative to Ctl.
